# Supplementary material for: Surfactant-promoted novel reductive synthesis of supported metallic Cu nanoclusters and their catalytic performances for selective dehydrogenation of methanol
Source: Royal Society of Chemistry journal article supplement (doi:10.1039/b504649a), 2005-01-01
Supplement: b504649a.pdf [file b504649a.pdf]

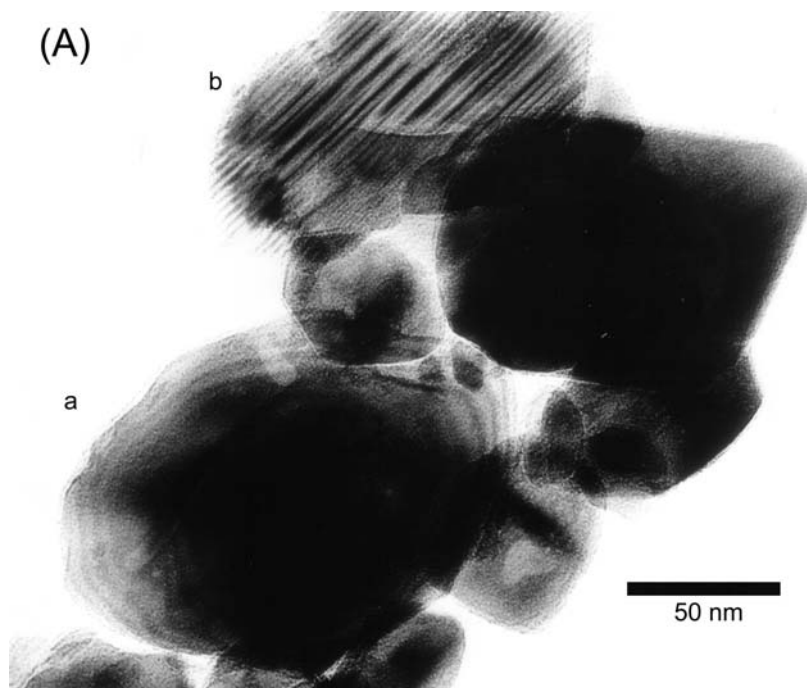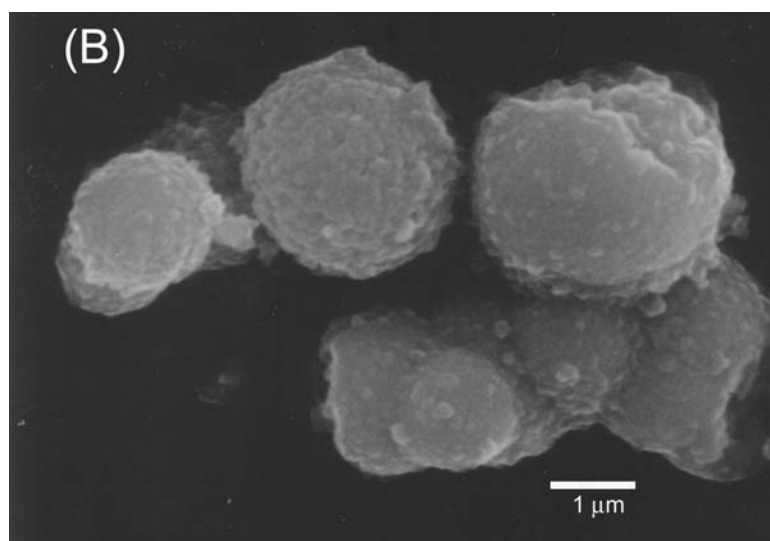

Supporting Information 1. TEM (A) and SEM (B) photographs of Cu/Mo-CTAB-3.1. In the TEM image a and b are basal and side views for stacked MoO<sub>2</sub>, respectively.

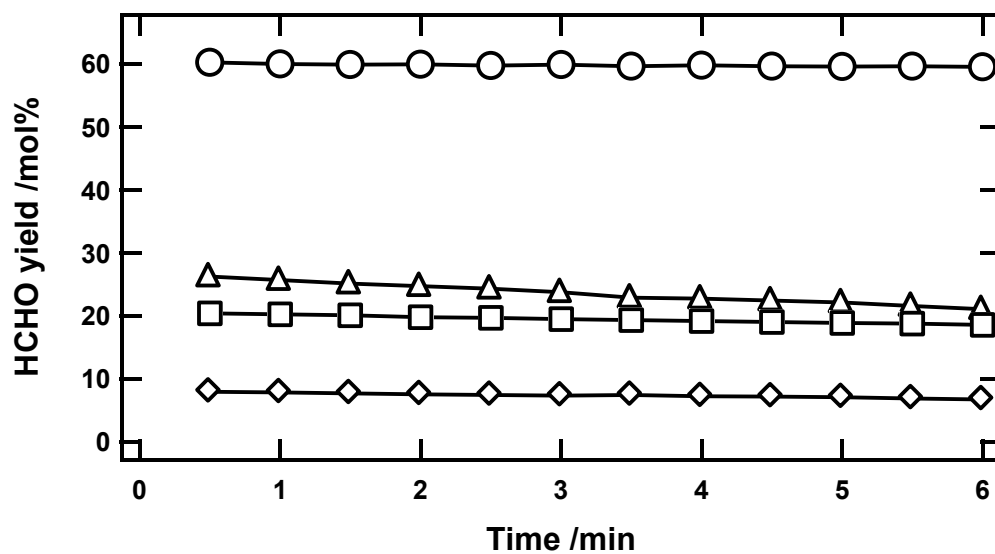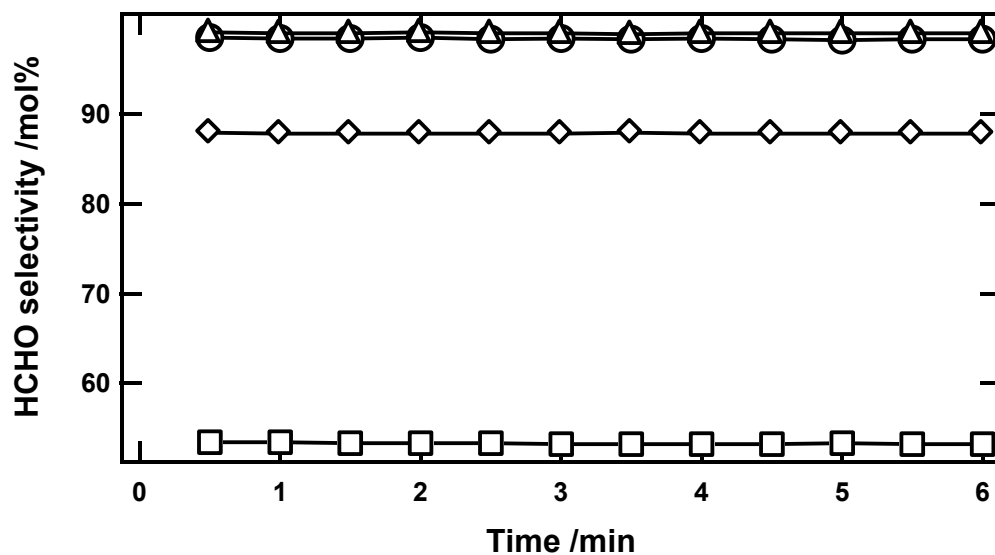

Supporting Information 2. HCHO yields and selectivities for the Cu nanoclusters supported on metal oxides. ○: Cu/Mo-CTAB-3.1, △: Cu/Zn-CTAB-3.7, ◇: Cu/Si-CTAB-4.3, and □: Cu/Al-CTAB-5.3.
